# Supplementary material
Source: Springer Nature journal article supplement (https://www.springermedizin.de/resource/supplementary/12874_2005_112_MOESM2_ESM.pdf/9433794)
Supplement: MOESM2 [file 9433794]

Potentially eligible studies identified by searches, duplicates removed (n=13989)

Studies identified through references (n=99)

Studies identified through handsearch (n=199)

Total potentially eligible studies available, duplicates removed (n=14038)

Studies excluded through screening: not relevant to study question (n= 13805)

Studies retrieved for detailed inclusion/exclusion (n=233)

Studies excluded: only included non-randomized trials (n=99); no comparison (n=53); comparison of strategies only (n=6); only one source searched (n=3); other (n=8)

Studies included in the systematic review (n=64)
